# Supplementary material for: A high-nuclearity CuI/CuII nanocluster catalyst for phenol degradation
Source: Royal Society of Chemistry journal article supplement (doi:10.1039/d1cc01319j), 2021-01-01
Supplement: d1cc01319j1.pdf [file d1cc01319j1.pdf]

# Supporting Information

## A high-nuclear Cu<sup>I</sup>/Cu<sup>II</sup> nanocluster catalyst for phenol degradation

Li-Juan Liu,<sup>‡a</sup> Jiang-Wei Zhang,<sup>‡b</sup> Muhammad Asad,<sup>a</sup> Zhao-Yang Wang,<sup>\*,a</sup> Shuang-Quan Zang<sup>\*,a</sup> and Thomas C. W. Mak<sup>a,c</sup>

<sup>a</sup> College of Chemistry, Zhengzhou University, Zhengzhou 450001, China.

<sup>b</sup> State Key Laboratory of Catalysis, Dalian Institute of Chemical Physics, Chinese Academy of Sciences (CAS) Dalian 116023, P.R. China.

<sup>c</sup> Department of Chemistry, The Chinese University of Hong Kong, Shatin, New Territories Hong Kong SAR, China.

### Materials and reagents.

All chemicals and solvents were purchased from commercial were used without further purification.

### Instrumentation.

PXRD data were collected at room temperature in the air using X'Pert PRO diffractometer (Cu K $\alpha$ ,  $\lambda = 1.54178 \text{ \AA}$ ). In situ PXRD patterns for the samples were collected in mother liquor on a Rigaku XtaLAB Pro diffractometer with Cu-K $\alpha$  radiation. UV-vis absorption spectra were recorded with a U-2000 spectrophotometer. HRESI-TOF-MS spectra were recorded on an AB Sciex X500R Q-TOF spectrometer. TEM images were acquired with a Tecnai G2 F20 S-TWIN transmission electron microscope (operated at an acceleration voltage of 200 kV). X-ray photoelectron spectroscopy (XPS) measurements were performed with a VG Scientific ESCALAB 250 instrument. EDS measurements were carried out using Zeiss Sigma 500. Phenol degradation was carried by high Performance Liquid Chromatography (HPLC) using Agilent 300Extend C18 column (5  $\mu\text{m}$  particles, 4.6 mm ID, 250 mm length). The mobile phase required for separation is CH<sub>3</sub>OH: H<sub>2</sub>O = 1:1.

### Single-Crystal X-ray Diffraction Analysis (SCXRD).

SCXRD measurements were performed on a Rigaku XtaLAB Pro diffractometer with Cu-K $\alpha$  radiation ( $\lambda = 1.54178 \text{ \AA}$ ) at 293 K for Cu<sub>54</sub>. Data collection and reduction were performed using the program CrysAlisPro<sup>1</sup>. The intensities were corrected for absorption using the empirical method implemented in SCALE3 ABSPACK scaling algorithm. The structures were solved with intrinsic phasing methods (*SHELXT-2015*)<sup>2</sup>, and refined by full-matrix least-squares on F<sup>2</sup> using *OLEX*<sub>2</sub>,<sup>3</sup> which utilizes the *SHELXL-2015* module.<sup>3</sup> The crystal structures are visualized by DIAMOND 3.2.<sup>4</sup>

### XAFS measurements:

The X-ray absorption fine structure spectra Cu K-edge were collected at BL14W1 beamline of Shanghai Synchrotron Radiation Facility (SSRF). The data were collected in fluorescence mode using a Lytle detector while the corresponding

reference samples were collected in transmission mode. The sample was finely grounded and uniformly spread on special adhesive tape.

**XAFS Analysis and Results:** The acquired EXAFS data were processed according to the standard procedures using the ATHENA module of Demeter software packages.

#### **Synthesis of Cu<sub>54</sub>.**

(<sup>t</sup>BuSCu)<sub>n</sub> (15 mg, 0.098 mmol) was ultrasonic dissolved in 6 mL chloroform, to which <sup>t</sup>BuPO<sub>3</sub>H<sub>2</sub> (5 mg, 0.037 mmol) was added. After stirring for 5 mins, S(SiMe<sub>3</sub>)<sub>2</sub> (4 μL) was added. The resulting solution was evaporated at room temperature for about 3 days to afford red polyhedral crystals of Cu<sub>54</sub> (yield 34%, based on Cu). Anal. Calcd for Cu<sub>54</sub>S<sub>13</sub>O<sub>6</sub>(<sup>t</sup>BuS)<sub>20</sub>(<sup>t</sup>BuSO<sub>3</sub>)<sub>12</sub>: C: 20.84%; H: 3.77%; S: 19.56%. Found: C: 20.963%; H: 3.78%; S: 18.98%.

#### **Preparation of Cu<sub>54</sub>/TiO<sub>2</sub> catalysts.**

200 mg TiO<sub>2</sub> (Rutile-typed, 99.99% (metals basis), 5-10 nm.) was added into an acetonitrile solution of 0.2 mg, 1 mg, 2 mg, 4 mg Cu<sub>54</sub> respectively. The resulting suspension was stirred at room temperature for 6 hours. The catalysts were collected by concentration and vacuum drying at room temperature and named as nCu<sub>54</sub>/TiO<sub>2</sub> (n= 0.1 wt.%, 0.5 wt.%, 1.0 wt.% and 2.0 wt.%). Note that the weight percentage refers to the ligand-protected form of the clusters.

#### **Photocatalytic reaction.**

The photocatalytic degradation reaction of phenol was carried out in a Pyrex reaction cell. Cu<sub>54</sub>/TiO<sub>2</sub> was dispersed in an aqueous solution containing given amounts of the pollutants (C<sub>0</sub> = 5 ppm). The concentration of phenol was monitored by HPLC. (Retention value: 7.26 = Phenol, 3.089 = Catechol, 2.89 = Hydroquinone, 2.688 = Benzoquinone).

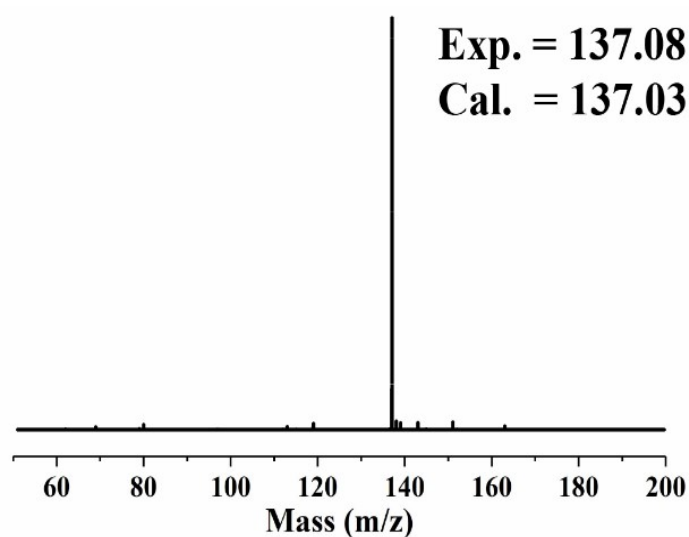

**Figure S1.** The mass spectrometry of Cu<sub>54</sub> in negative ion mode.

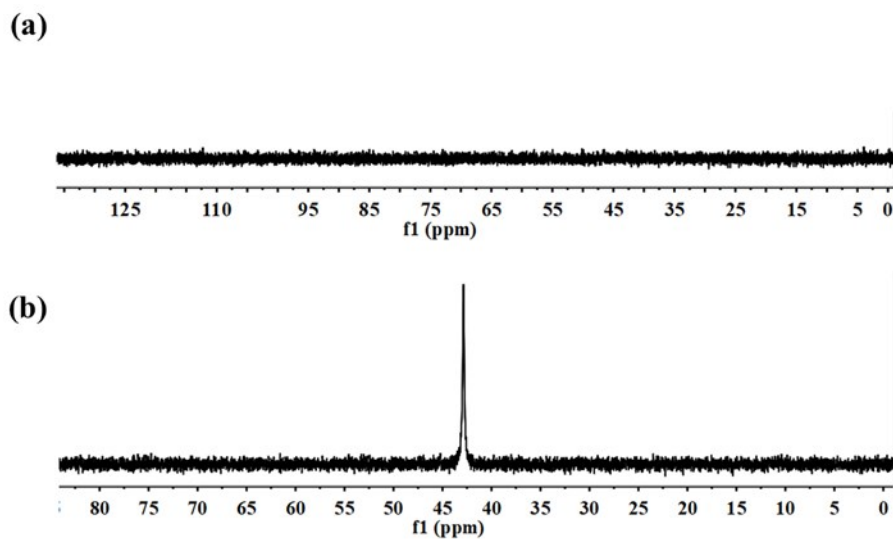

**Figure S2.** The  $^{31}\text{P}$  NMR spectra of (a)  $\text{Cu}_{54}$ ; (b)  $^t\text{BuPO}_3\text{H}_2$ .

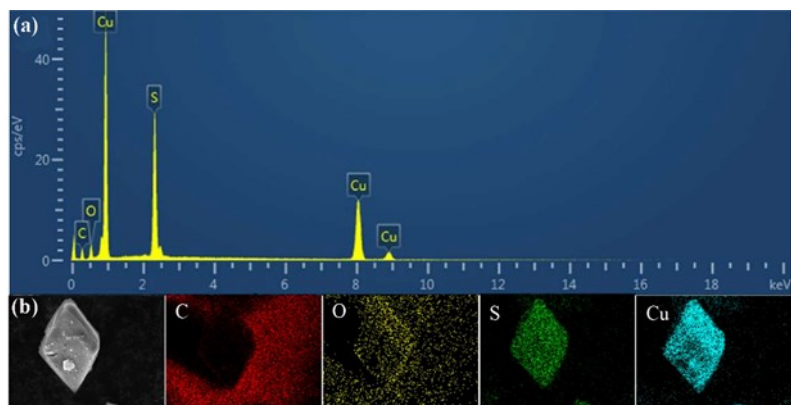

**Figure S3.** (a) The X-ray energy spectrum of  $\text{Cu}_{54}$ ; (b) Elemental distribution of  $\text{Cu}_{54}$ .

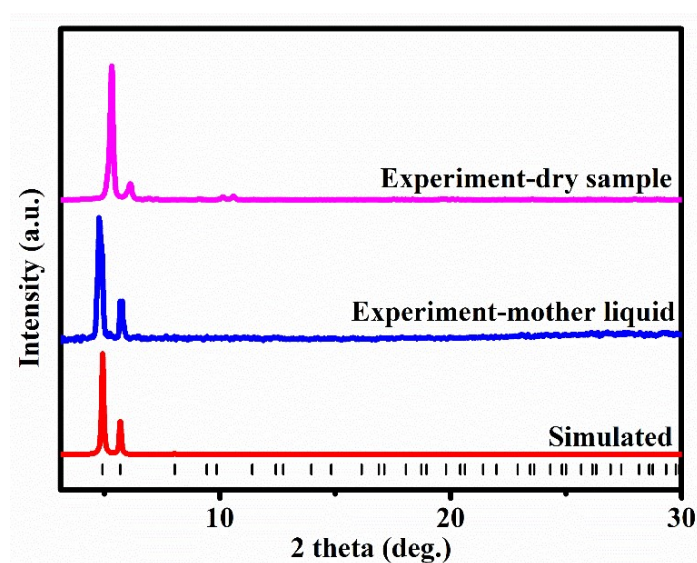

**Figure S4.** Powder X-ray diffraction pattern (PXRD) of  $\text{Cu}_{54}$ .

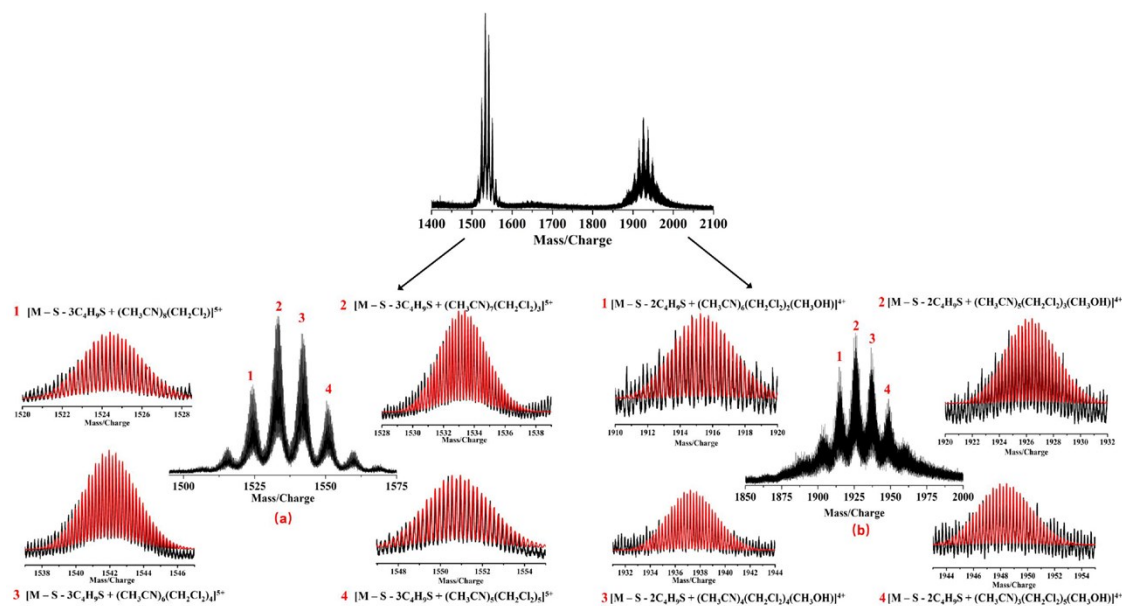

**Figure S5.** Positive mode ESI-TOF-MS spectra of  $\text{Cu}_{54}$ . Inset: Enlarged portion of the spectrum showing the measured (black) and simulated (red) isotopic distribution patterns ( $M = \text{Cu}_{54}\text{S}_{13}\text{O}_8(^t\text{BuS})_{20}(^t\text{BuSO}_3)_{12}(\text{CH}_3\text{OH})(\text{H}_2\text{O})$ ).

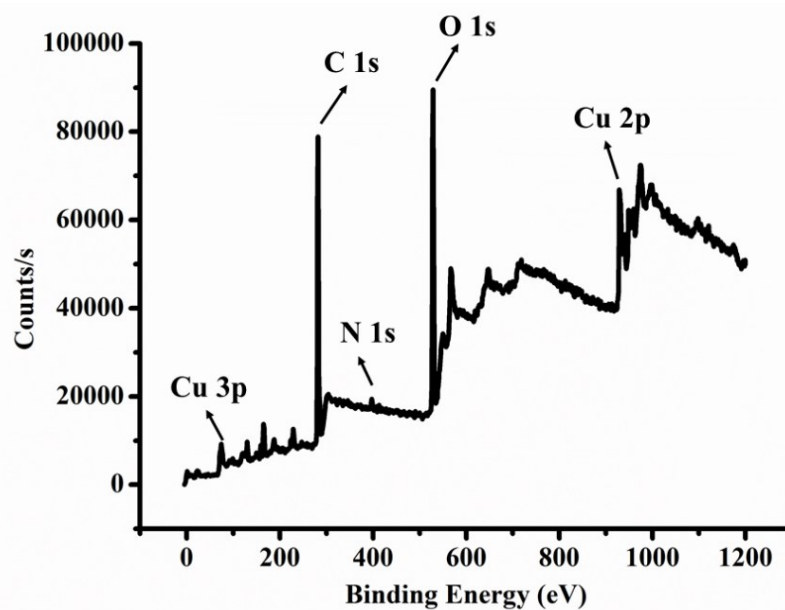

**Figure S6.** XPS spectrum of  $\text{Cu}_{54}$ .

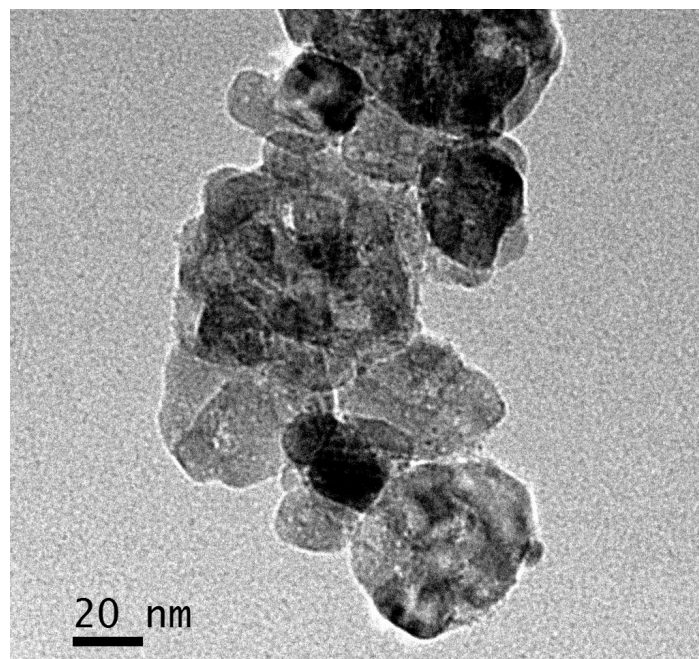

**Figure S7.** TEM image of 1.0 wt.%  $\text{Cu}_{54}/\text{TiO}_2$ .

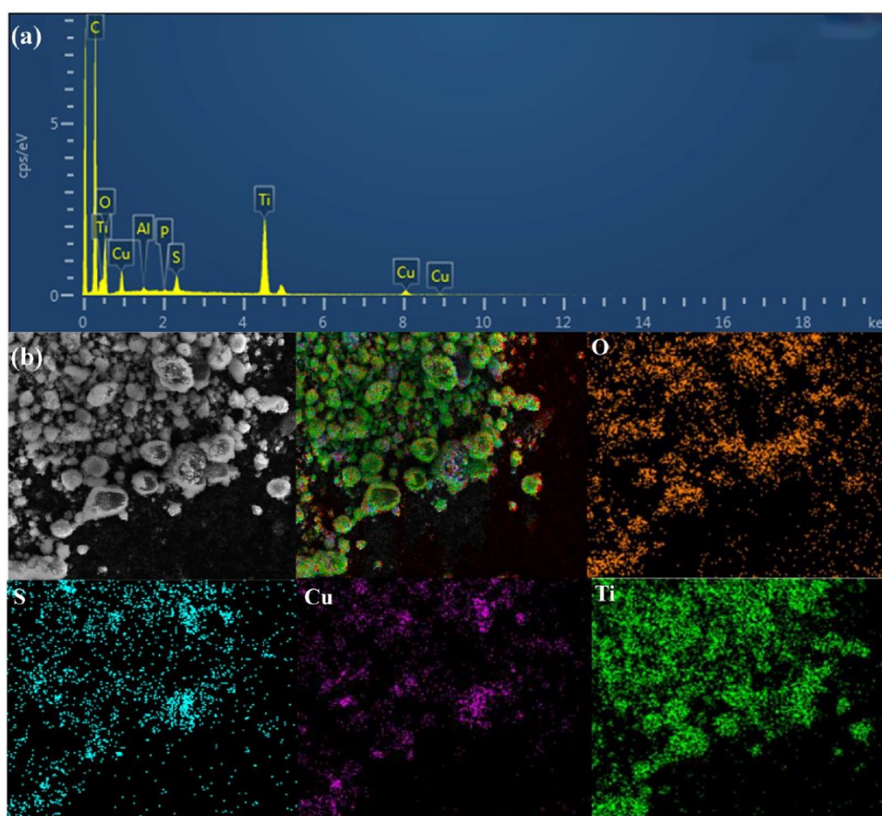

**Figure S8.** (a) The X-ray energy spectrum of 1.0 wt.%  $\text{Cu}_{54}/\text{TiO}_2$ ; (b) Elemental distribution of 1.0 wt.%  $\text{Cu}_{54}/\text{TiO}_2$ .

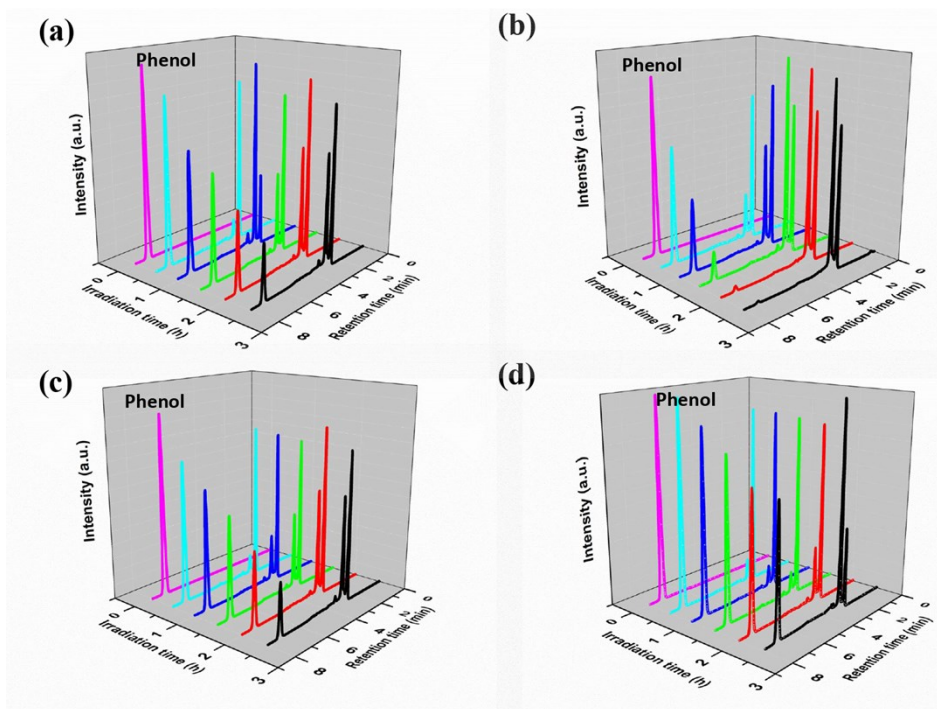

**Figure S9.** HPLC chromatograms of phenol degradation over (a) 0.1 wt.%  $\text{Cu}_{54}/\text{TiO}_2$ ; (b) 0.5 wt.%  $\text{Cu}_{54}/\text{TiO}_2$ ; (c) 2.0 wt.%  $\text{Cu}_{54}/\text{TiO}_2$ ; (d)  $\text{TiO}_2$ .

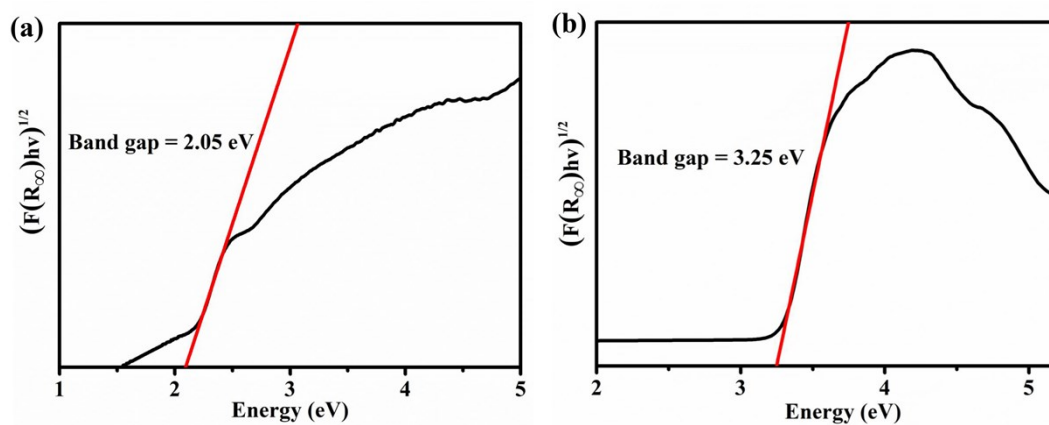

**Figure S10.** Band gap energy estimation using extrapolation method for (a)  $\text{Cu}_{54}$ ; (b)  $\text{TiO}_2$ .

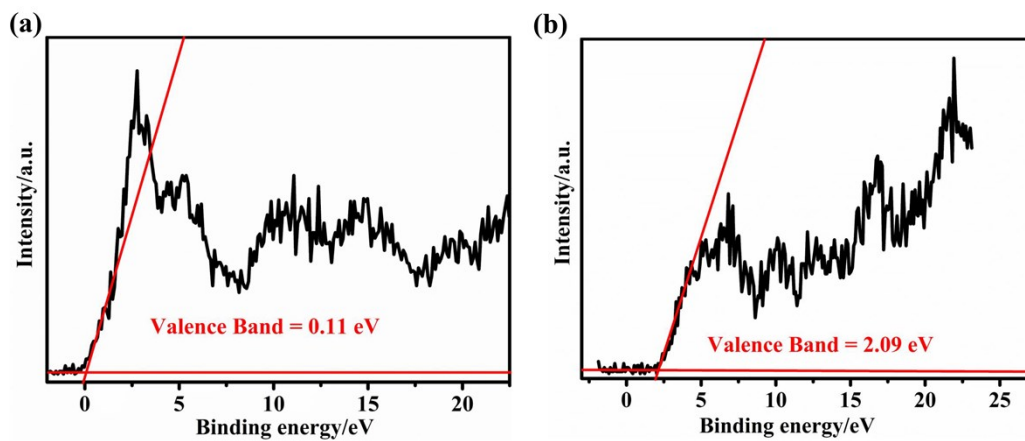

**Figure S11.** Valence band XPS spectrum of (a)  $\text{Cu}_{54}$ ; (b)  $\text{TiO}_2$ .

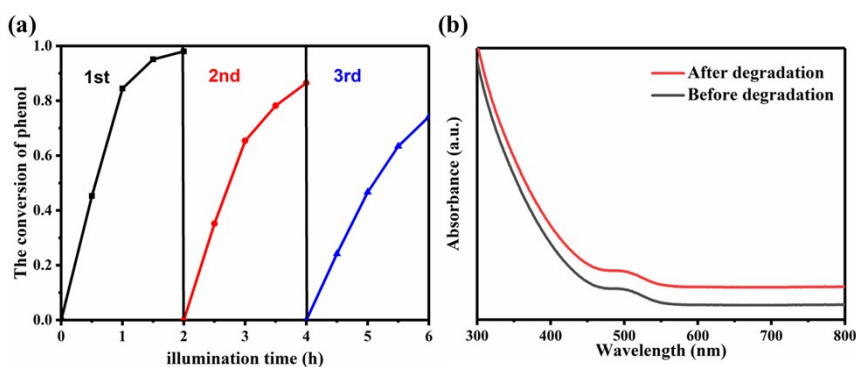

**Figure S12.** (a) Recycling tests of 1.0 wt.%  $\text{Cu}_{54}/\text{TiO}_2$  for phenol degradation under visible light irradiation. (b) UV-visible absorption spectra of  $\text{Cu}_{54}$  in  $\text{CH}_2\text{Cl}_2/\text{CH}_3\text{CN}$  mixture ( $\text{CH}_2\text{Cl}_2$ :  $\text{CH}_3\text{CN}$  = 1:1).

**Table S1. Crystallographic data and structure refinement for  $\text{Cu}_{54}$ .**

|                                                |                                                                              |
|------------------------------------------------|------------------------------------------------------------------------------|
| CCDC number                                    | 2047196                                                                      |
| Empirical formula                              | $\text{C}_{127.99}\text{H}_{287.98}\text{Cu}_{54}\text{O}_{44}\text{S}_{45}$ |
| Formula weight                                 | 7404.83                                                                      |
| Temperature/K                                  | 293(2)                                                                       |
| Crystal system                                 | cubic                                                                        |
| Space group                                    | $Fm-3$                                                                       |
| $a/\text{\AA}$                                 | 31.03414(18)                                                                 |
| $b/\text{\AA}$                                 | 31.03414(18)                                                                 |
| $c/\text{\AA}$                                 | 31.03414(18)                                                                 |
| $\alpha/^\circ$                                | 90                                                                           |
| $\beta/^\circ$                                 | 90                                                                           |
| $\gamma/^\circ$                                | 90                                                                           |
| Volume/ $\text{\AA}^3$                         | 29889.5(5)                                                                   |
| Z                                              | 4                                                                            |
| $\rho_{\text{calc}}/\text{g/cm}^3$             | 1.646                                                                        |
| $\mu/\text{mm}^{-1}$                           | 7.282                                                                        |
| F(000)                                         | 14776.0                                                                      |
| Crystal size/ $\text{mm}^3$                    | $0.1 \times 0.1 \times 0.1$                                                  |
| Radiation                                      | $\text{Cu K}\alpha$ ( $\lambda = 1.54178$ )                                  |
| $2\theta$ range for data collection / $^\circ$ | 11.404 to 130.724                                                            |
| Index ranges                                   | $-14 \leq h \leq 36$ , $-23 \leq k \leq 35$ , $-25 \leq l \leq 17$           |
| Reflections collected                          | 6632                                                                         |
| Independent reflections                        | 2224 [ $R_{\text{int}} = 0.0218$ , $R_{\text{sigma}} = 0.0253$ ]             |
| Data/restraints/parameters                     | 2224/63/170                                                                  |
| Goodness-of-fit on $F^2$                       | 1.059                                                                        |
| Final $R$ indexes [ $I \geq 2\sigma(I)$ ]      | $R_1 = 0.0745$ , $wR_2 = 0.2086$                                             |
| Final $R$ indexes [all data]                   | $R_1 = 0.0824$ , $wR_2 = 0.2164$                                             |
| Largest diff. peak/hole / $e \text{\AA}^{-3}$  | 1.08/-0.74                                                                   |

$${}^a R_1 = \frac{\sum ||F_o| - |F_c||}{\sum |F_o|}, \quad {}^b wR_2 = \frac{[\sum w(F_o^2 - F_c^2)^2 / \sum w(F_o^2)^2]}{1/2}$$

**Table S2. Correlation linear fitting calibration parameters of precise oxidation state determination of Cu<sub>54</sub>, and Cu foil, CuO references.**

|                         |                     |
|-------------------------|---------------------|
| Equation                | $y = a + b \cdot x$ |
| Plot                    | $E_0$               |
| Weight                  | No Weighting        |
| Intercept               | Cell://[Book1]Fi    |
| Slope                   | Cell://[Book1]Fi    |
| Residual Sum of Squares | 0                   |
| Pearson's r             | 1                   |
| R-Square (COD)          | 1                   |

### Reference

- (1) CrysAlisPro 2012, Agilent Technologies. Version 1.171.36.31.
- (2) Sheldrick, G. M. *Acta Cryst. A* **2015**, *71*, 3-8.
- (3) Dolomanov, O. V.; Bourhis, L. J.; Gildea, R. J.; Howard, J. A. K.; Puschmann, H. *J. Appl. Cryst.* **2009**, *42*, 339-341.
- (4) Brandenburg, K. Diamond, 2010.
